# Supplementary material for: The MoLfa1 Protein Regulates Fungal Development and Septin Ring Formation in Magnaporthe oryzae
Source: MDPI journal article supplement (doi:10.3390/ijms25063434), 2024-03-19
Supplement: s1 [file s1]

## Supplementary Material

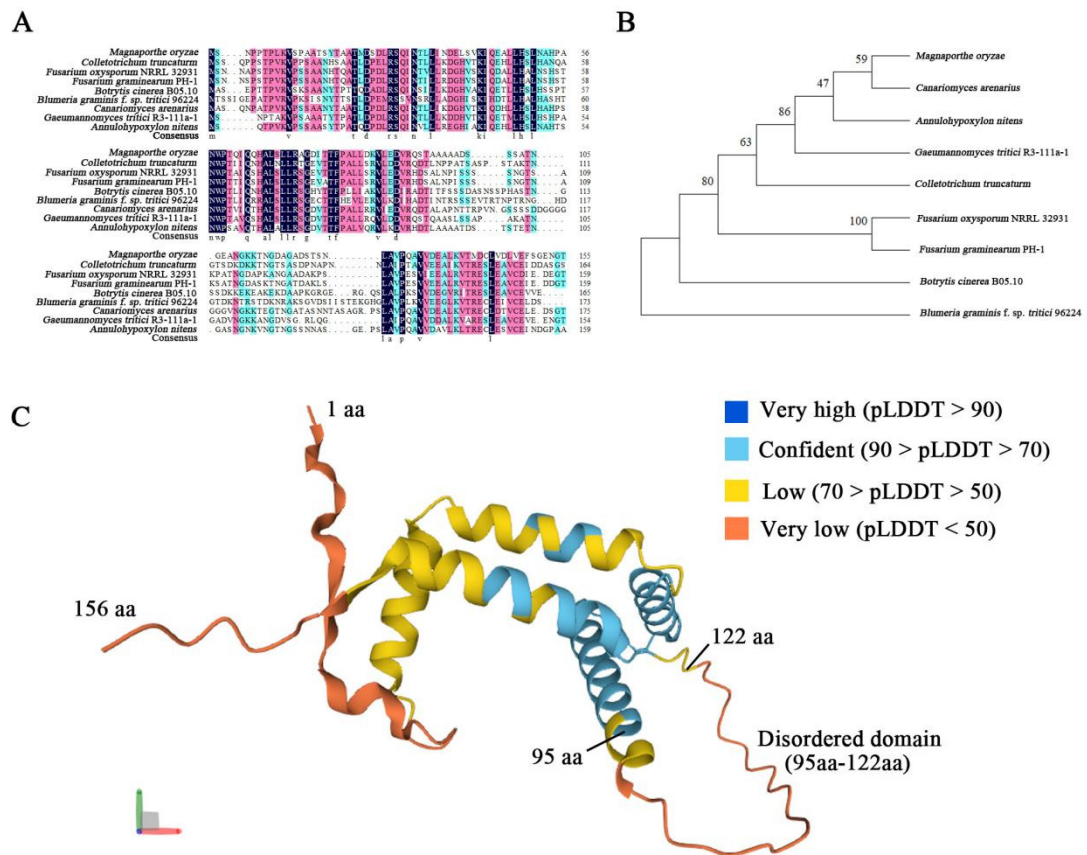

Fig. S1. Identification of MoLfa1 in *M. oryzae*. (A) CLUSTALW was used to align the amino acids of Lfa1 in *M. oryzae* (MoLfa1) with those of the homologous proteins in *C. truncatum* (XP\_036575343.1), *F. oxysporum* NRRL 32931 (EWY86874.1), *F. graminearum* PH-1 (XP\_011324077.1), *B. cinerea* B05.10 (XP\_001553949.2), *B. graminis* f. sp. *tritici* 96224 (EPQ63018.1), *C. arenarius* (KAK4115313.1), *G. tritici* R3-111a-1 (XP\_009217046.1), and *A. nitens* (KAI0901762.1). (B) MoLfa1 homology analysis in different species. (C) Molecular structure prediction of MoLfa1 protein. AlphaFold produces a per-residue confidence score (pLDDT) between 0 and 100. Some regions with low pLDDT may be unstructured in isolation. 95-122aa is a disordered region.

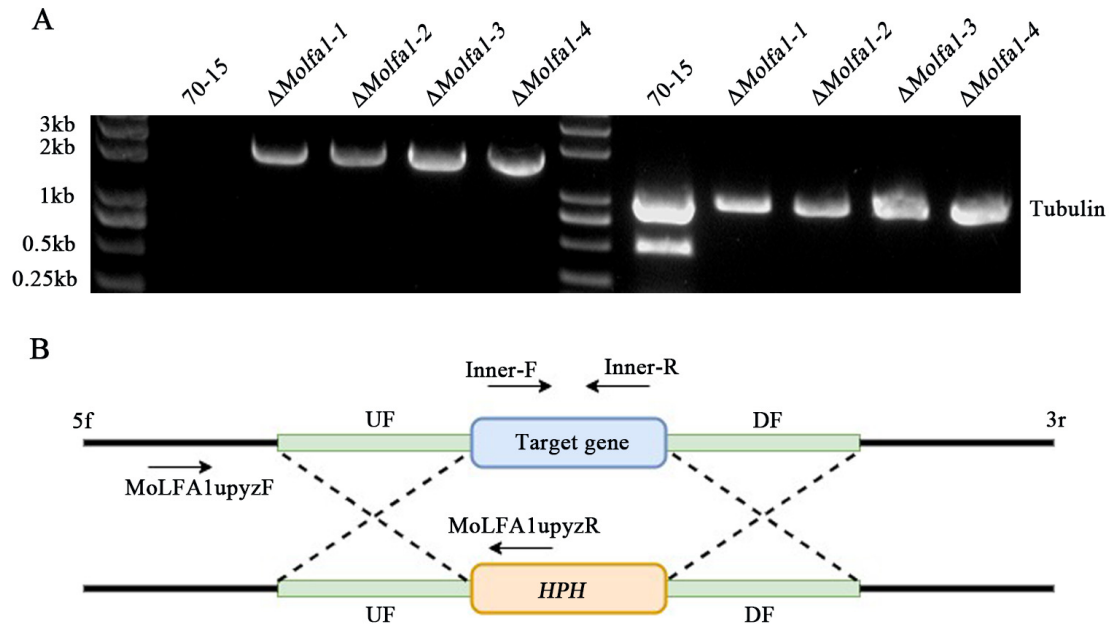

Fig. S2. The targeted gene in the transformant was screened by PCR using the tubulin gene as a positive control. A 0.5 kb short band was amplified from the wild-type strain and the ectopic transformant, indicating that the target gene was contained, whereas the 0.5 kb short band was not found in the null mutant. A unique recombinant DNA fragment labeled as a knockout event in the transformant was screened by PCR. A 1.5-2.5 kb long band was amplified from the null mutant, whereas the wild-type strain and the ectopic transformant did not have the long band. (B) The knockout model in *M. oryzae*.

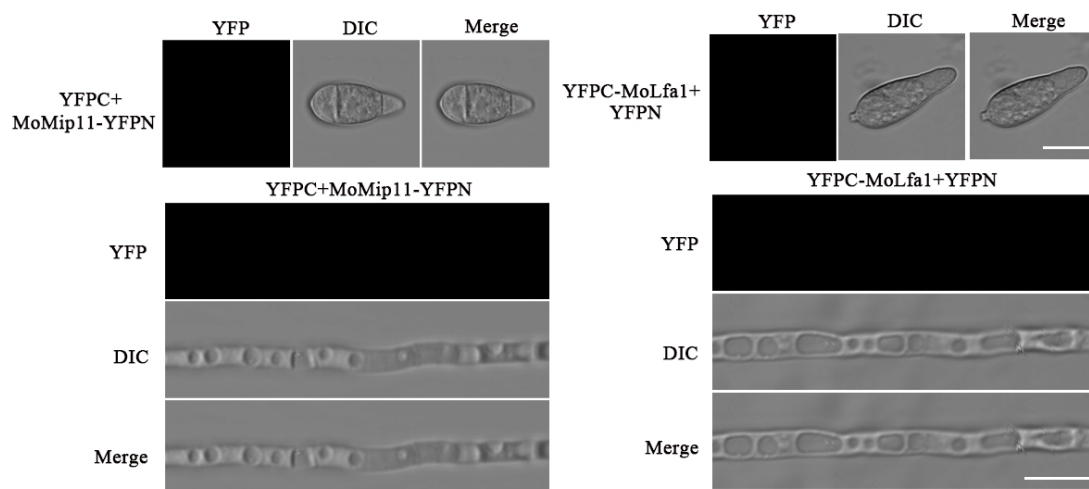

Fig. S3. A negative control of the interaction between MoLfa1 and MoMip11 in vivo.

Construct pairs of YFPC-MoLfa1 and YFPN, MoMip11-YFPN, and YFPC were co-transformed into wild-type 70-15 by ATMT to serve as negative controls. Bar, 10  $\mu\text{m}$ .

| Name                           | Sequence (5' - 3')                     |
|--------------------------------|----------------------------------------|
| Primers used for gene knockout |                                        |
| HPH-F                          | TAGTGGAGGTCAACAATGAATG                 |
| HPH-R                          | CATCTACTCTATTCCTTTGCCC                 |
| MoLFA1up-F                     | AGGCTAACTGACACTCTAGAATGAGATGGAGGCGGTAT |

**Table S1 Primers in this study**

|                                         |                                          |
|-----------------------------------------|------------------------------------------|
| MoLFA1up-R                              | TGTTGACCTCCACTAACAGAAAGAGGAAGGCAGT       |
| MoLFA1dn-F                              | GGAATAGAGTAGATGACCTCATTGAGGCCCTATGC      |
| MoLFA1dn-R                              | CGACGGCCAGTGCCAAGCTTGATGAAGAATGCTGGCCC   |
| MoLFA1inner-F                           | TCCGGCGGCGACAAGTTAT                      |
| MoLFA1inner-R                           | CGACTAAATCGACTAAGCAG                     |
| MoLFA1upyz-F                            | CCGACAAAGCTTTCCTGCAC                     |
| MoLFA1upyz-R                            | GTCGGAGACGCTGTCGAACTT                    |
| Tubulin-F                               | CCATCCCGAGCTTGTTGATA                     |
| Tubulin-R                               | GTAGTTCAGGTCACCGTATGAG                   |
| Primers used for complementation        |                                          |
| pKD5-MoLFA1-GFP-F                       | ATCACAATGGCCGGATCCATGTCAAACCCACCGACACCG  |
| pKD5-MoLFA1-GFP-R                       | CTTGCTCACCATCCCGGGAGTAGTGCCATTCTCCCCCGA  |
| pKD5-MoLFA1-N1-GFP-F                    | ATCACAATGGCCGGATCCATGTCAAACCCACCGACACC   |
| pKD5-MoLFA1-N1-GFP-R                    | CTTGCTCACCATCCCGGGCGCAGTGCTCTGCCTGACGT   |
| pKD5-MoLFA1-N2-GFP-F                    | ATCACAATGGCCGGATCCCGGGCGGCGGGCGGATTTCATC |
| pKD5-MoLFA1-N2-GFP-R                    | CTTGCTCACCATCCCGGGAGTAGTGCCATTCTCCCCCGA  |
| Primers used in fluorescent observation |                                          |
| MoLfa1-mCherry-F                        | ATCACAATGGCCGGATCCATGTCAAACCCACCGACACCG  |
| MoLfa1-mCherry-R                        | CTTGCTCACCATCCCGGGAGTAGTGCCATTCTCCCCCGA  |
| Primer used for Pull-down               |                                          |
| MoLfa1-GST-F                            | CTGGTTCCGCGTGGATCCATGTCAAACCCACCGACACCG  |
| MoLfa1-GST-R                            | CGGGAATTCCGGGGATCCAGTAGTGCCATTCTCCCCCGA  |
| MoMip11-His-F                           | CAAGGTCGACAAGCTTATGGCTGAGCAGCTCATT       |
| MoMip11-His-R                           | GTGCGGCCGCAAGCTTTGCCCTAGACATGACGCC       |
| Primer used for BiFC                    |                                          |
| YFPC-MoLfa1-F                           | GAGCTGTACAAGTCTAGAATGTCAAACCCACCGACACCG  |
| YFPC-MoLfa1-R                           | CGCTTACTGCAGGTCGACAGTAGTGCCATTCTCCCCCGA  |
| MoMip11-YFPN-F                          | GTCAAAATGGTCGGATCCATGGCTGAGCAGCTCATT     |
| MoMip11-YFPN-R                          | GGCGATGGAGCGCCCGGGTGCCCTAGACATGACGCC     |
